# Supplementary material for: Phosphorus recovery by re-dissolution from activated sludge – effects of carbon source and supplementation level revisited
Source: Royal Society of Chemistry journal article supplement (doi:10.1039/d2ew00356b), 2022-11-15
Supplement: d2ew00356b1.pdf [file d2ew00356b1.pdf]

## **Supplementary Material**

### **Phosphorus recovery by re-dissolution from activated sludge – Effects of carbon source and supplementation level revisited**

Annika Anders, Harald Weigand, Harald Platen

Competence Centre for Sustainable Engineering and Environmental Systems (ZEuUS), THM  
University of Applied Sciences, Wiesenstr. 14, D-35390 Giessen, Germany.

---

#### **Table of contents**

- Table S1: Best-fit parameters ( $I$  [0 min; 220 min]) of the modified Gompertz model used to describe the kinetics of P re-dissolution after supplementation of activated sludge with formate, acetate, propionate and butyrate
- Calculation of indicators of the P re-dissolution stoichiometry
- Table S2: Key enzymes and transporter involved in polyP hydrolysis, glycogen degradation and PHB synthesis
- Additional information on Figure 3

**Table S1:** Best-fit parameters (I [0 min; 220 min]) of the modified Gompertz model used to describe the kinetics of P re-dissolution after supplementation of activated sludge with formate, acetate, propionate and butyrate.

|                         | formate              | acetate               | propionate           | butyrate             |
|-------------------------|----------------------|-----------------------|----------------------|----------------------|
| $A_{\max}$ [mmol P/L]   | 0.25                 | 1.45                  | 0.56                 | 0.46                 |
| $\mu$ [mmol P/ (L*min)] | $1.41 \cdot 10^{-3}$ | $17.20 \cdot 10^{-3}$ | $4.29 \cdot 10^{-3}$ | $2.58 \cdot 10^{-3}$ |
| $\lambda$ [min]         | 28.57                | 8.49                  | 14.93                | 29.71                |
| $R^2$                   | 0.990                | 0.991                 | 0.991                | 0.977                |

### Calculation of indicators of the P re-dissolution stoichiometry

#### **$P_{\text{release}}/C_{\text{uptake}}$ ratio:**

$P_{\text{release}}/C_{\text{uptake}}$  ratios were calculated for the time  $t_{\mu}$  of the maximum P release rate  $\mu$  as predicted from the modified Gompertz model (Equation (1)). For each of the different VFA supplementations  $t_{\mu}$  was located by equating the second derivative of the modified Gompertz model (Equation (2)) to zero. Employing the best-fit parameters summarized in Table 1A  $t_{\mu}$  values were 40 min, 63 min, 94 min and 96 min for acetate, propionate, formate and butyrate, respectively. Equation (1) was solved for  $P_{i,\text{rel}}(t_{\mu})$  to obtain the numerator of the  $P_{\text{release}}/C_{\text{uptake}}$  ratio. Its denominator was found from the corresponding VFA time profile (Figure 1B). Therefore, linear regression lines fit to an appropriate time interval were evaluated for the  $t_{\mu}$  values.  $C_{\text{uptake}}$  was calculated from obtained aqueous phase VFA concentration converted in C-mol.

#### Modified Gompertz Model:

$$P_{i,\text{rel}}(t) = A_{\max} \cdot \exp \left\{ -\exp \left[ \frac{\mu \cdot \exp(1)}{A_{\max}} (\lambda - t) + 1 \right] \right\} \quad (1)$$

Second derivative:

$$P_{i,rel}''(t) = \frac{\mu}{A_{max}} \cdot \left\{ \exp \left[ \frac{\mu \cdot \exp(1) \cdot (\lambda - t)}{A_{max}} \right] - 1 \right\} \cdot \exp \left\{ \frac{\mu \cdot \exp(1) \cdot (\lambda - t)}{A_{max}} + 3 - \exp \left[ \frac{\mu \cdot \exp(1) \cdot (\lambda - t)}{A_{max}} + 1 \right] \right\} \quad (2)$$

$$P_{i,rel}''(t) = 0 \quad \text{with} \quad t = \frac{A_{max}}{\mu \cdot \exp(1)} + \lambda$$

**$P_{yield}/VFA_{spike}$  and  $P_{yield}/VFA_{consumed}$  ratio:**

$P_{yield}/VFA_{spike}$  and  $P_{yield}/VFA_{consumed}$  were calculated with Equation (3) and (4), respectively.

The term  $P_{i,rel,t=220 \text{ min}}$  [mmol P] is the aqueous P concentration at the end of the experiment.

$VFA_{spike,t=0 \text{ min}}$  [mmol VFA] is the initial concentration of the supplemented VFA.  $VFA_{t=220 \text{ min}}$  [mmol VFA] is the aqueous VFA concentration at the end of the experiment.

$$\frac{P_{Yield}}{VFA_{spike}} = \frac{P_{i,rel,t=220 \text{ min}}}{VFA_{spike,t=0 \text{ min}}} \quad (3)$$

$$\frac{P_{Yield}}{VFA_{consumed}} = \frac{P_{i,rel,t=220 \text{ min}}}{VFA_{spike,t=0 \text{ min}} - VFA_{t=220 \text{ min}}} \quad (4)$$

**Table S2:** Key enzymes and transporter involved in polyP hydrolysis, glycogen degradation and PHB synthesis.

| No. | EC number <sup>a</sup> | name                                                       |
|-----|------------------------|------------------------------------------------------------|
| 1   | --                     | low affinity inorganic phosphate transporter (pit)         |
| 2   | --                     | acetate permease, acetate:H <sup>+</sup> symporter (ActP)  |
| 3   | 3.6.1.1                | inorganic diphosphatase                                    |
| 4   | 6.2.1.1                | acetate-CoA ligase                                         |
| 5   | 2.7.4.3                | adenylate kinase                                           |
| 6   | 2.3.1.9                | acetyl-CoA C-acetyltransferase                             |
| 7   | 1.1.1.35               | 3-hydroxyacyl-CoA dehydrogenase                            |
| 8   | 2.3.1.304              | poly((R)-3-hydroxyalkanoate) polymerase                    |
| 9   | 2.7.4.1                | polyphosphate kinase 1                                     |
| 10  | 2.4.1.1                | glycogen phosphorylase                                     |
| 11  | 5.4.2.6                | beta-phosphoglucomutase                                    |
| 12  | 5.3.1.9                | glucose-6-phosphate isomerase                              |
| 13  | 2.7.1.11               | 6-phosphofructokinase                                      |
| 14  | 4.1.2.13               | fructose-bisphosphate aldolase                             |
| 15  | 5.3.1.1                | triose-phosphate isomerase                                 |
| 16  | 1.2.1.12               | glyceraldehyde-3-phosphate dehydrogenase (phosphorylating) |
| 17  | 2.7.2.3                | phosphoglycerate kinase                                    |
| 18  | 5.4.2.11/5.4.2.12      | phosphoglycerate mutase                                    |
| 19  | 4.2.1.11               | phosphopyruvate hydratase                                  |
| 20  | 2.7.1.40               | pyruvate kinase                                            |
| 21  | 1.2.1.104              | pyruvate dehydrogenase system                              |
| 22  | 7.1.2.2                | H <sup>+</sup> transporting ATPase                         |
| 23  | --                     | Mg <sup>2+</sup> transporter                               |

<sup>a</sup> obtained using the MetaCyc database<sup>S1</sup>

### **Additional information on Figure 3: PolyP composition**

Please note that intracellular polyP is stabilized by metal counter ions such as  $\text{Mg}^{2+}$ ,  $\text{K}^+$ ,  $\text{Na}^{2+}$  or  $\text{Ca}^{2+}$ . The contribution of individual ions in polyP granula has been suggested to depend on EBPR conditions and influent composition.<sup>S2</sup> Li et al. (2019)<sup>S2</sup> found an approximate relation of P:Mg:Na:K in the stoichiometric ratio of 1 : 0.3 : 0.17 : 0.17 for polyP granules in EBPR sludge.

For simplification, in Figure 3, we assumed that polyP has  $\text{Mg}^{2+}$  as a counter ion, only. The stoichiometric ratio of P to  $\text{Mg}^{2+}$  of 2:1, was derived from the molecular formula  $(\text{NaPO}_3)_n$  (Graham's salt). Therefore, during anaerobic P re-dissolution and with hydrolysis of polyP 1 mol P will be released together with 0.5 mol  $\text{Mg}^{2+}$ .

### **References**

- S1 R. Caspi, R. Billington, I. M. Keseler, A. Kothari, M. Krummenacker, P. E. Midford, W. K. Ong, S. Paley, P. Subhraveti and P. D. Karp, The MetaCyc database of metabolic pathways and enzymes-a 2019 update, *Nucleic Acids Res.*, 2020, **48**, D455–D453.
- S2 Y. Li, S. M. Rahman, G. Li, W. Fowle, P. H. Nielsen and A. Z. Gu, The Composition and Implications of Polyphosphate-Metal in Enhanced Biological Phosphorus Removal Systems, *Environ. Sci. Technol.*, 2019, **53**, 1536–1544.
